# Supplementary material for: Changes in Skeletal Muscle PAK1 Levels Regulate Tissue Crosstalk to Impact Whole Body Glucose Homeostasis
Source: PubMed Central journal article supplement (PMC8881144; doi:10.3389/fendo.2022.821849), 2022-02-11

**Figure 1 A):**

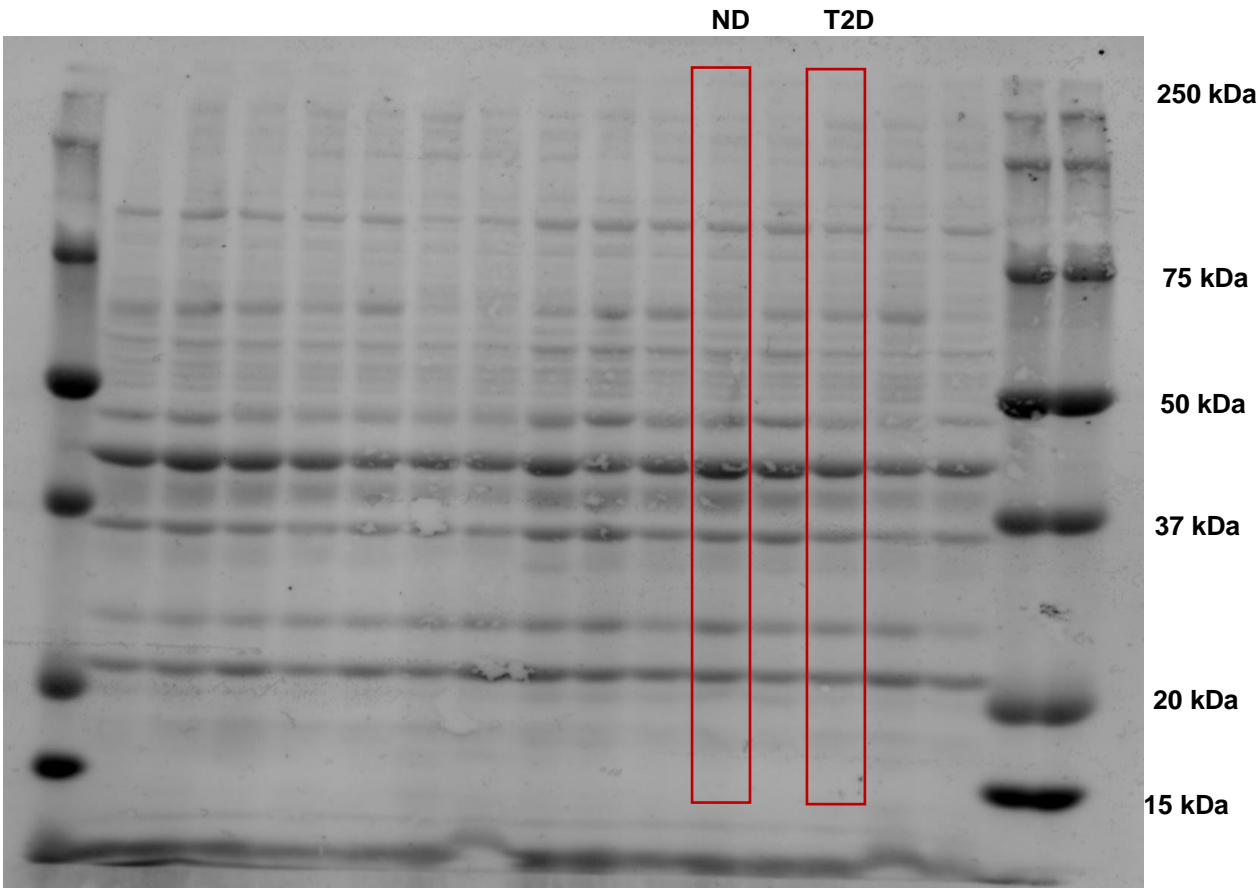

**Figure 2 B):**

**Skeletal muscle**

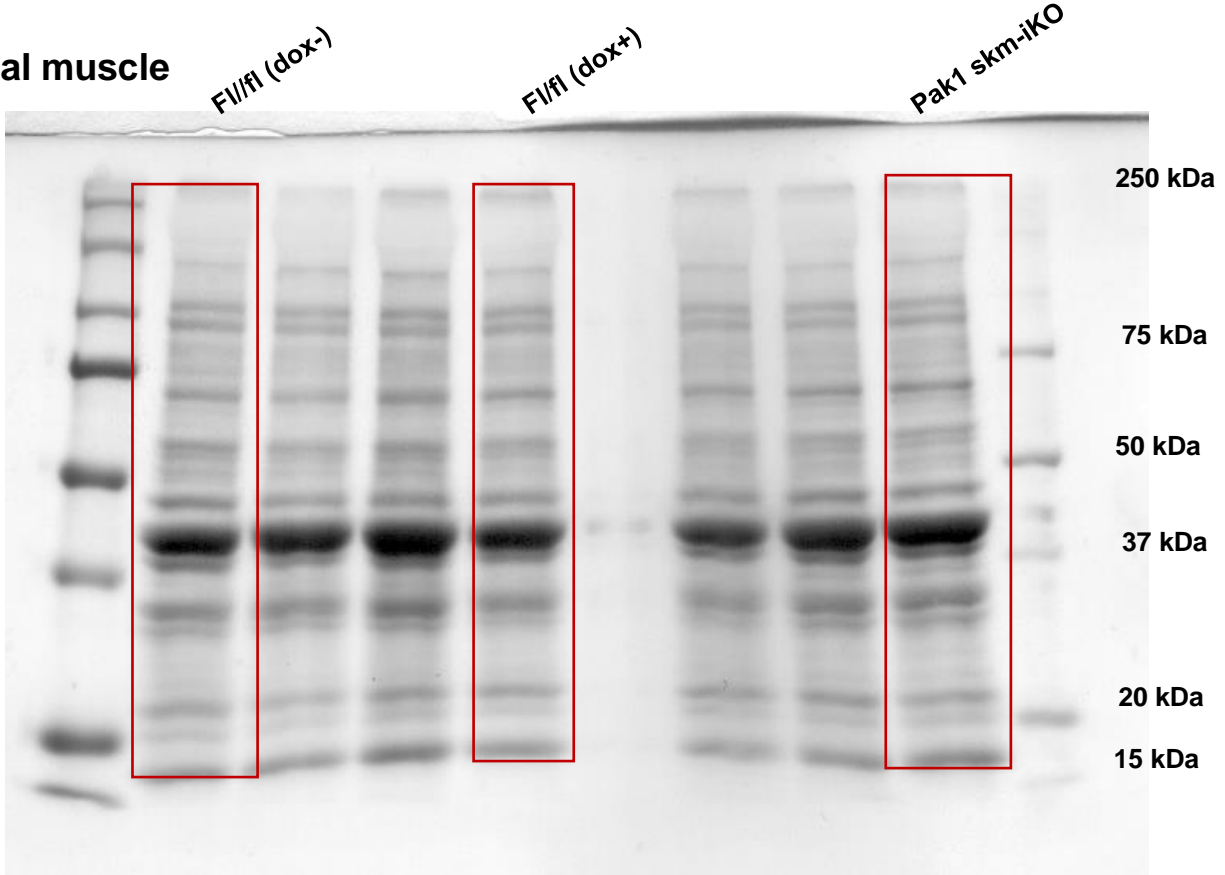

**Heart**

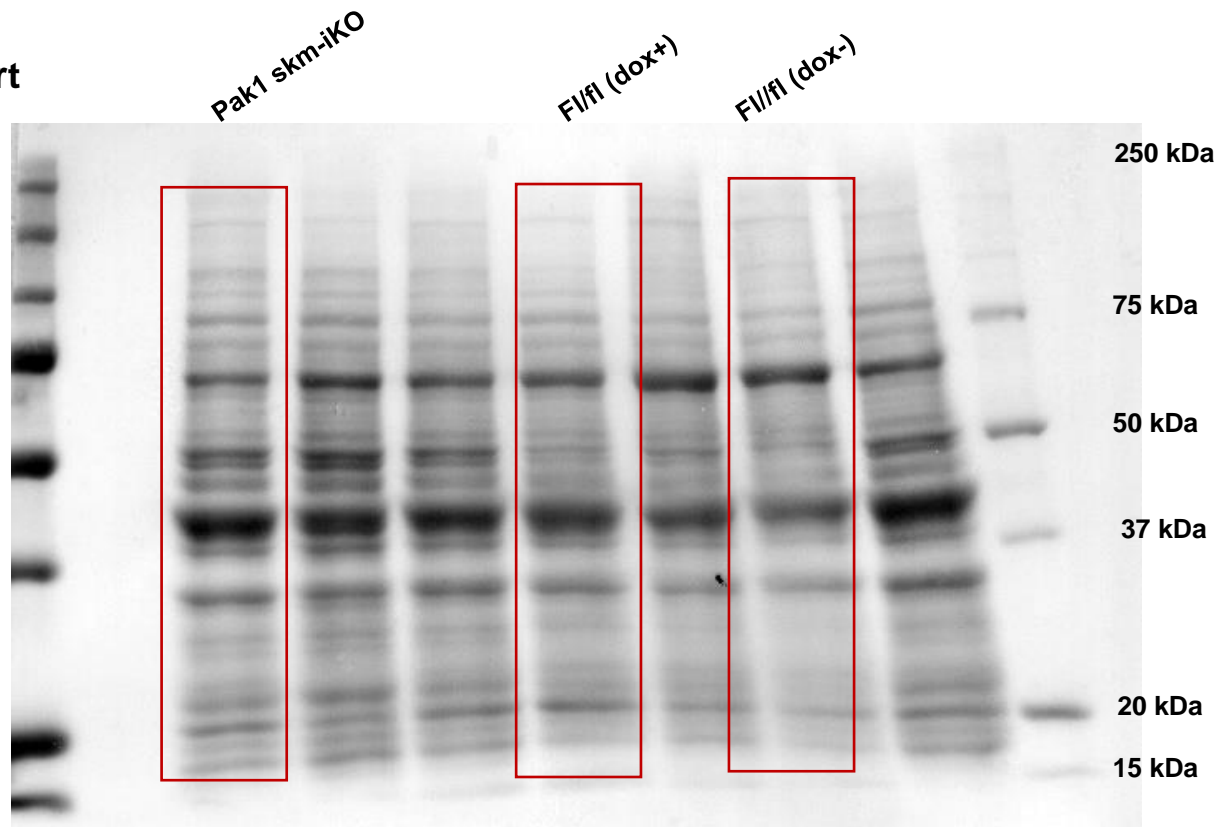

**Figure 3 B):**

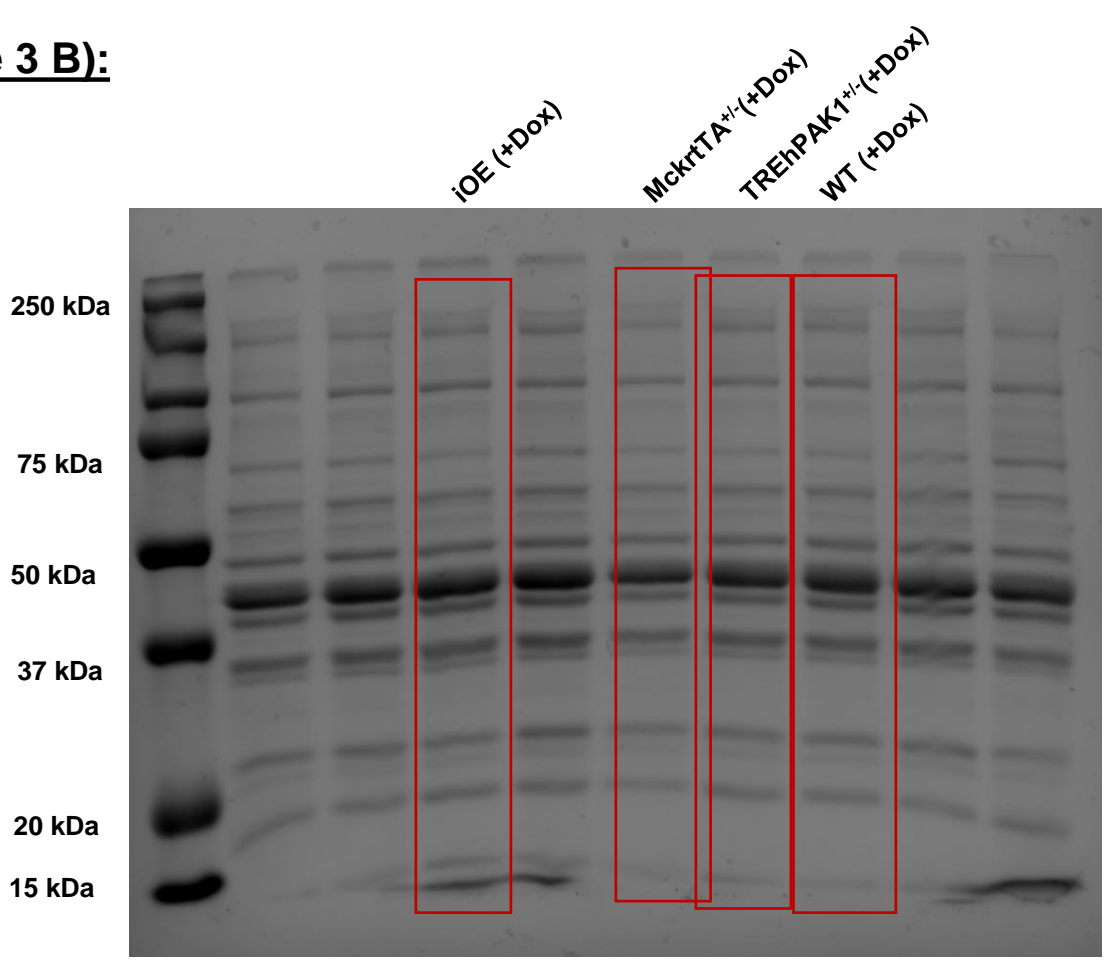

**Figure 3 H):**

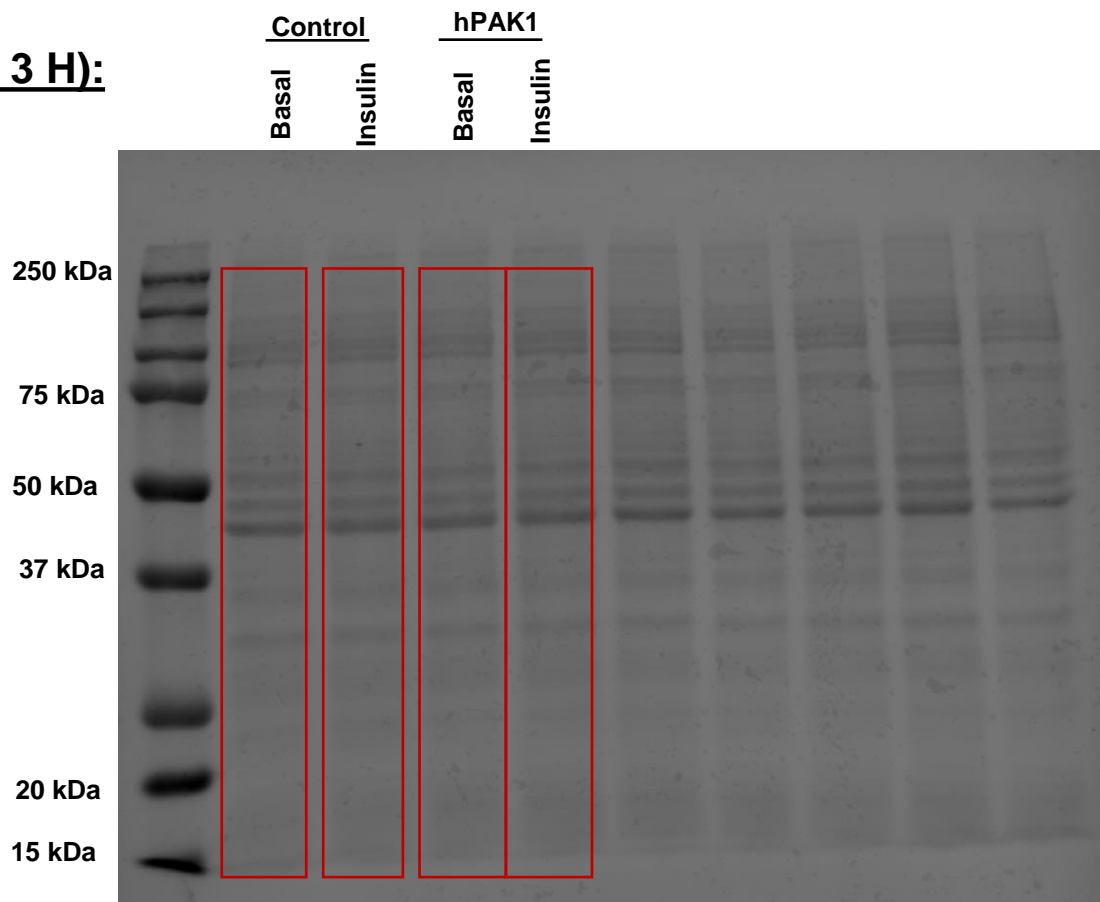

**Figure 4 B):**

Non-transduced  
Ad-GFP  
Ad-GFP $\Delta$ PAK1

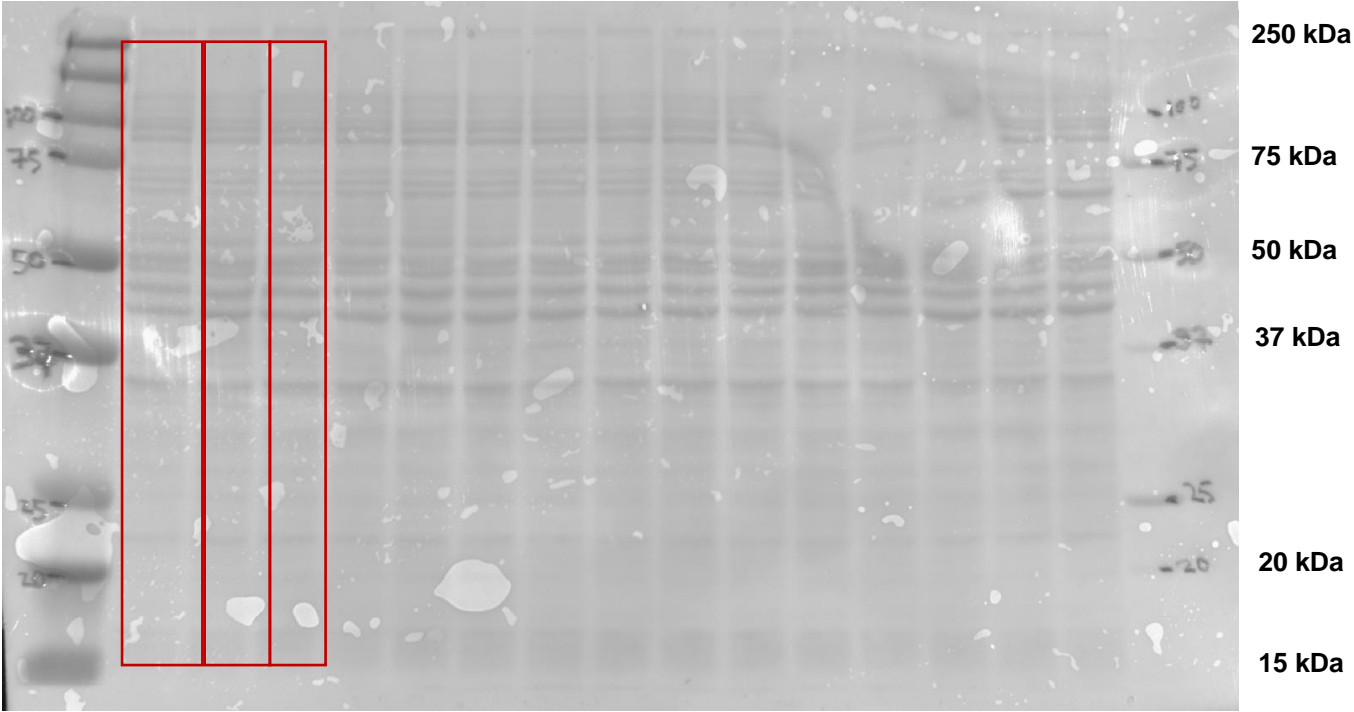

**Figure 5 B):**

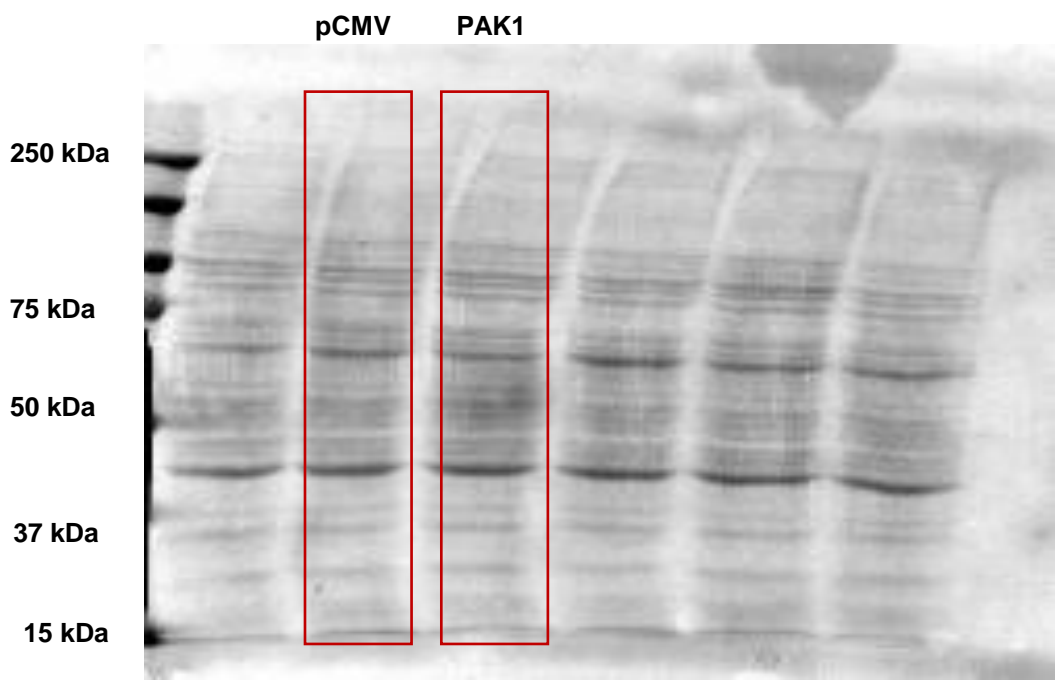

**Supplemental Figure 2 B):**

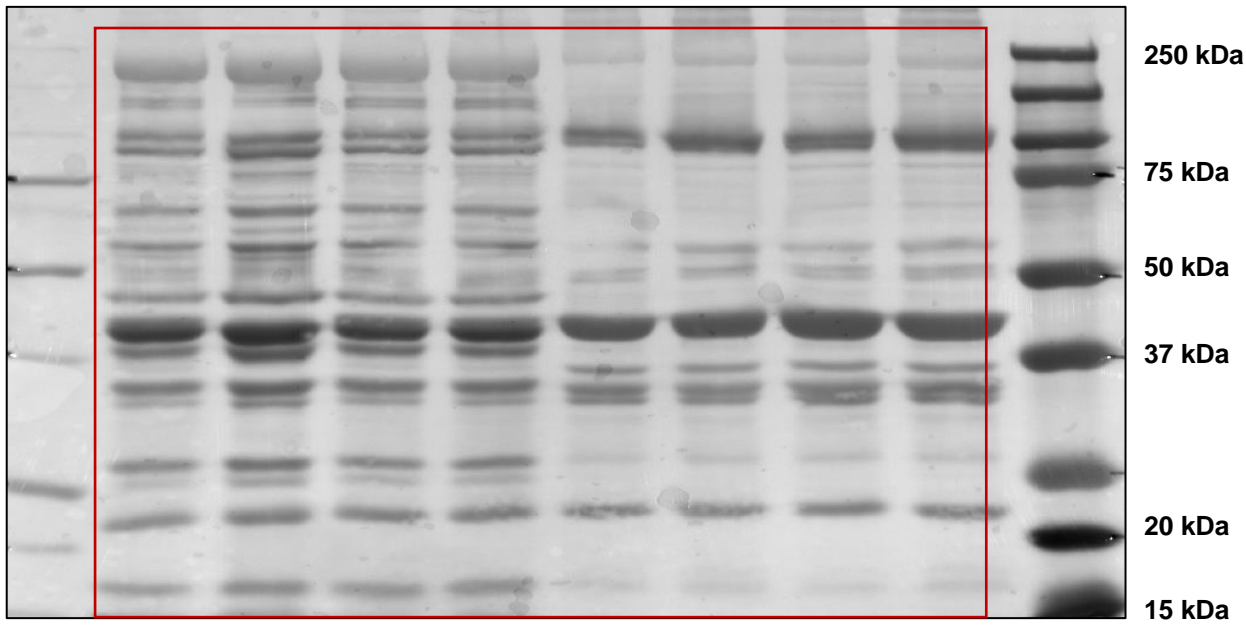

**Supplemental Figure 2 C):**

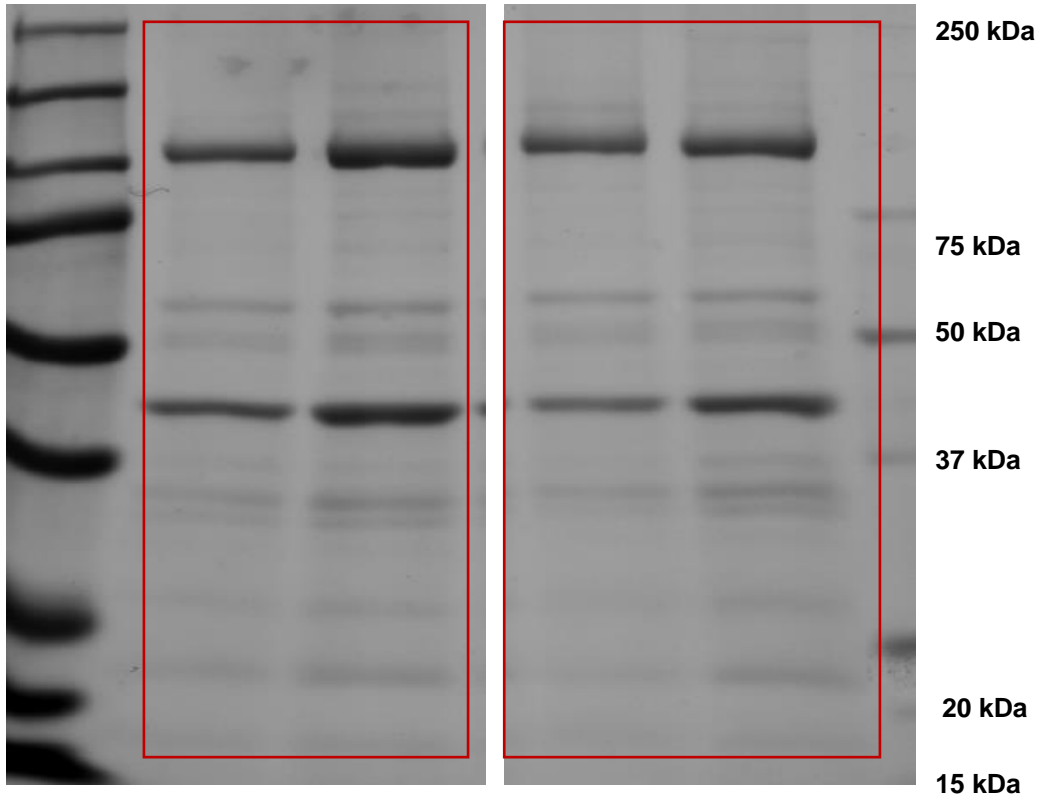

**Supplemental Figure 3 A):**

**Skeletal muscle-PAK1**

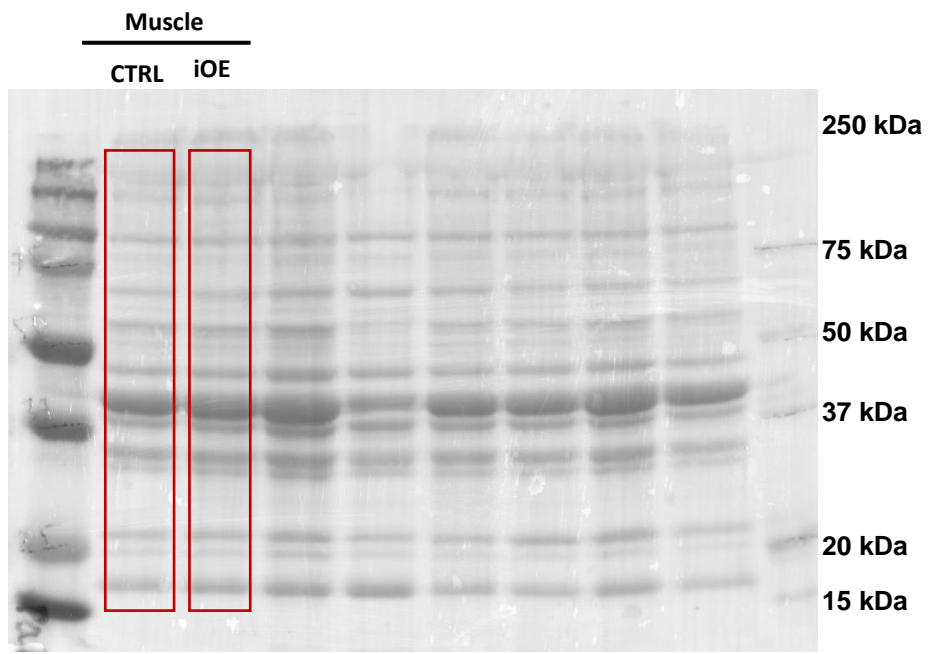

**Skeletal muscle-GLUT4**

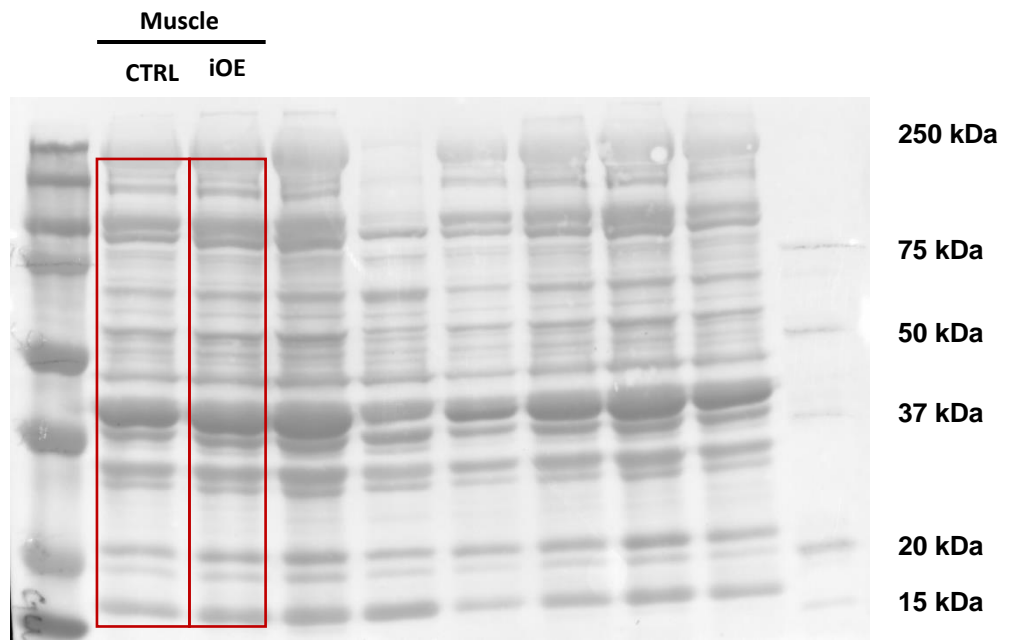

**Supplemental Figure 3 A):**

**Heart-PAK1**

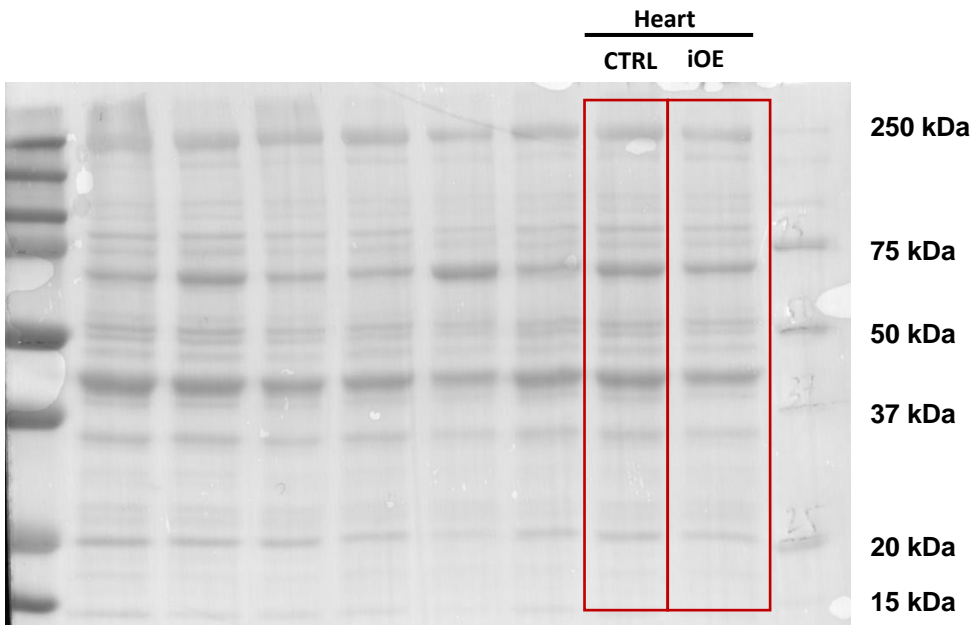

**Heart-GLUT4**

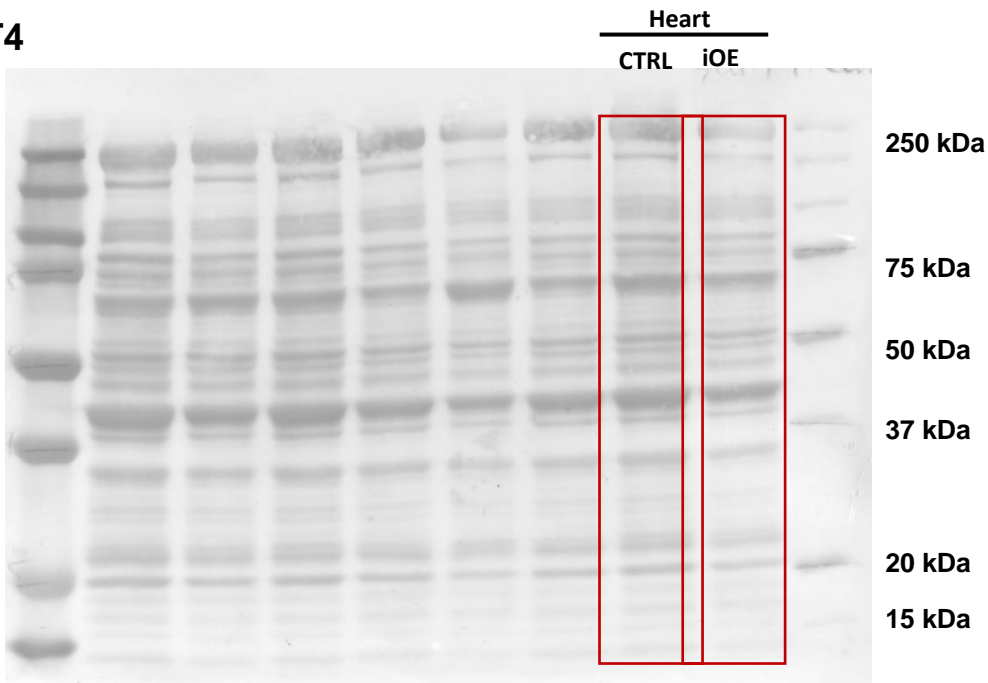



**Supplemental Figure 3 A):**

**Liver-PAK1**

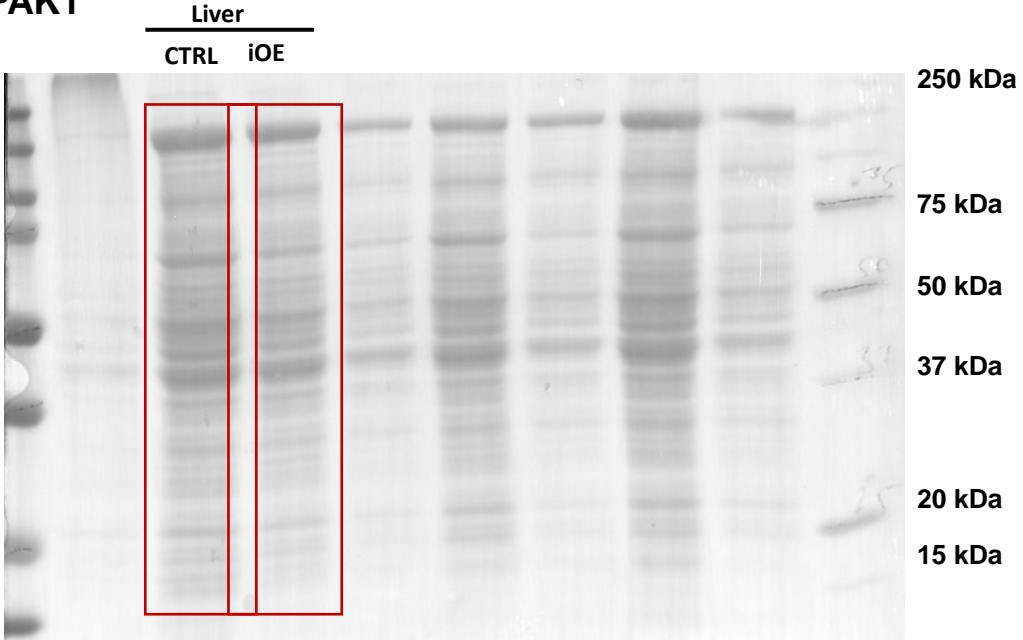

**Liver-GLUT4**

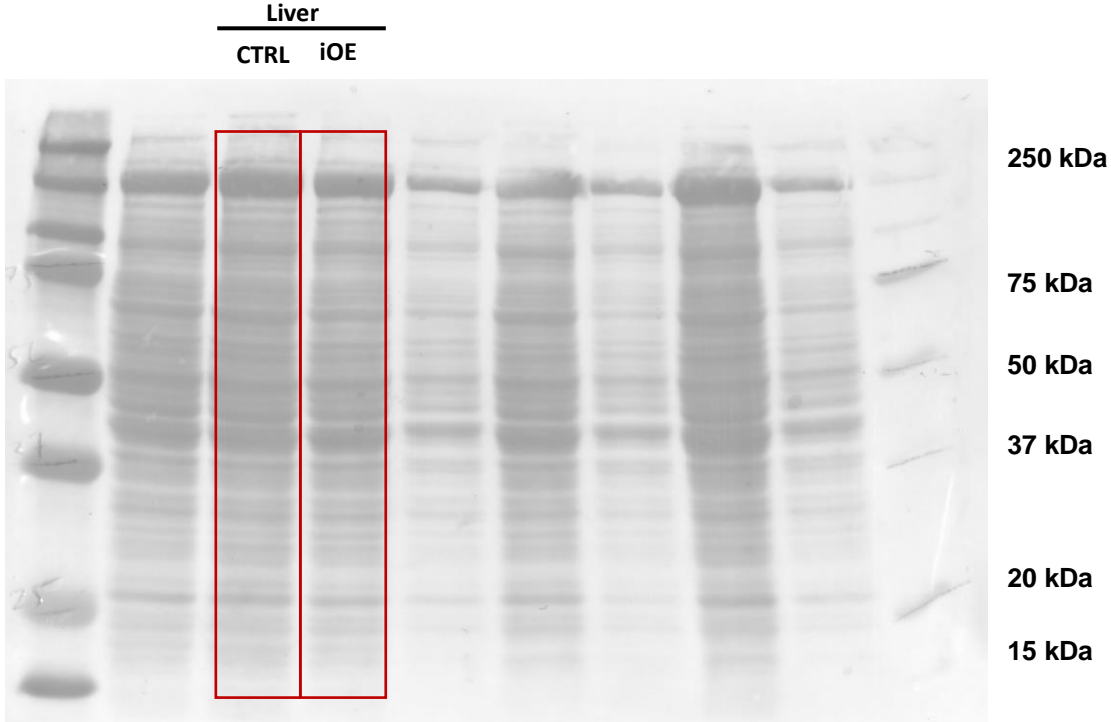

**Supplemental Figure 3 B):**

**Skeletal muscle**

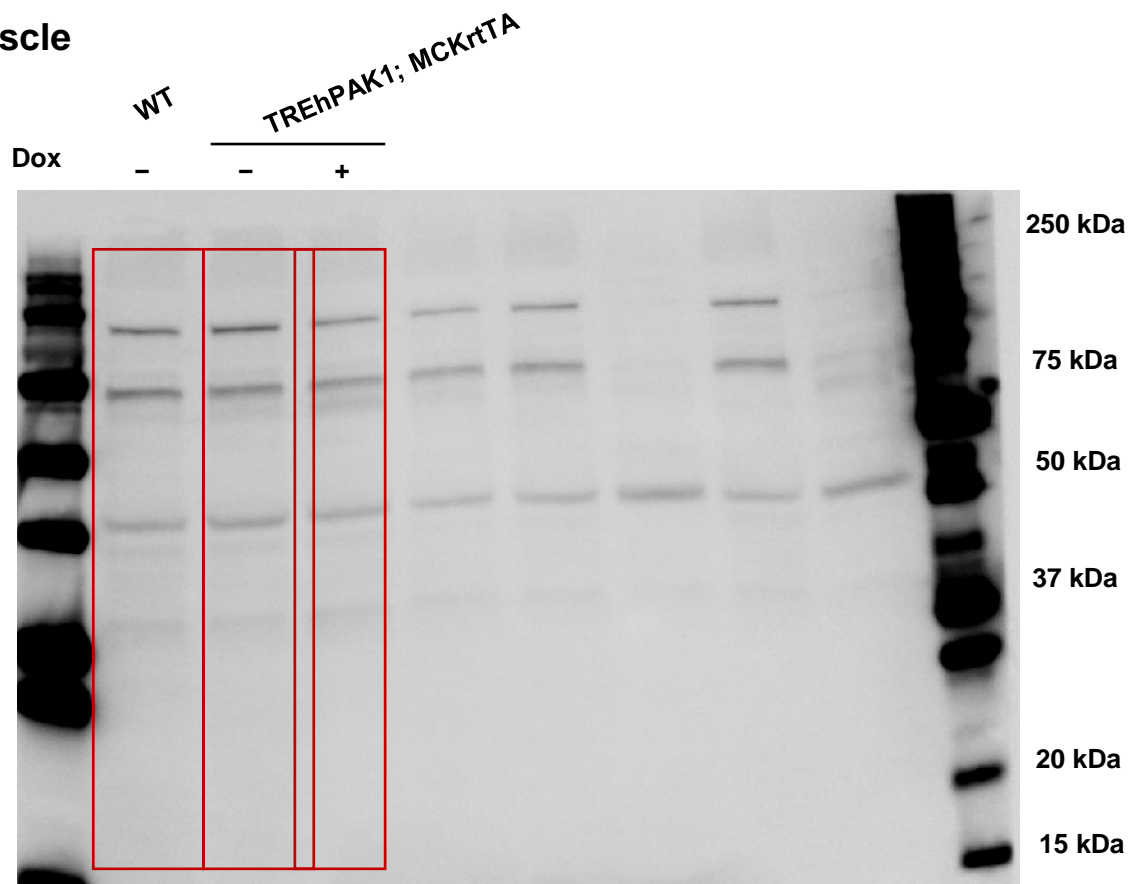

Supplement: DataSheet_2.pdf [file DataSheet_2.pdf]
